# Supplementary material for: Evaluating renal injury characteristics in different rat models of hyperuricemia and elucidating pathological molecular mechanisms via serum metabolomics
Source: Front Pharmacol. 2024 Sep 2;15:1433991. doi: 10.3389/fphar.2024.1433991 (PMC11403331; doi:10.3389/fphar.2024.1433991)
Supplement: Supplementary file 1 [file Table1.xls]

## Sheet: Sheet2
No.	Name	Formula	Molecular Weight	RT [min]	m/z	M1.vs.NC_Pvalue	M1.vs.NC_VIP	M1.vs.NC_Up.Down	M2.vs.NC_Pvalue	M2.vs.NC_VIP	M2.vs.NC_Up.Down	M3.vs.NC_Pvalue	M3.vs.NC_VIP	M3.vs.NC_Up.Down
1	Orotidine	C10 H12 N2 O8	288.059	1.856	287.051	1.22798e-08	1.90117	up	1.73471e-09	2.17779	up	2.63497e-06	2.09455	up
2	Genistein	C15 H10 O5	270.052	5.91	269.045	0.00703123	1.03272	up	0.00580797	1.39465	up	0.0178351	1.49233	up
3	indoline-2-carboxylic acid	C9 H9 N O2	163.064	5.543	164.071	0.0211976	1.05854	up	0.0281857	1.09533	up	0.00253068	1.6382	up
4	3-Chloro-L-tyrosine	C9 H10 Cl N O3	215.034	5.349	214.027	0.00323905	1.58828	up	2.76289e-05	1.79006	up	1.38494e-05	1.88559	up
5	p-Hydroxybenzaldehyde	C7 H6 O2	122.037	5.325	105.034	0.0313194	1.25249	up	0.00104175	1.3923	up	0.000464559	1.75151	up
6	2-Hydroxy-4-methylthiobutanoic acid	C5 H10 O3 S	150.035	5.191	149.027	0.0216164	1.55465	up	0.020634	1.61919	up	0.0074076	1.60077	up
7	Indole-3-lactic acid	C11 H11 N O3	205.073	5.524	204.066	0.028826	1.00379	up	0.00325471	1.45605	up	0.00269819	1.60315	up
8	L-Leucyl-L-Alanine	C9 H18 N2 O3	202.132	4.115	203.139	0.0367507	1.07788	up	0.000856627	2.18557	up	0.00251752	1.44069	up
9	2-(2-chlorophenyl)-1-cyclohexyl-6-oxopiperidine-3-carboxylic acid	C18 H22 Cl N O3	335.132	1.342	334.125	0.027189	1.51969	up	0.0228786	1.63671	up	0.00927274	1.54635	up
10	LPE 17:0	C22 H46 N O7 P	467.301	9.719	468.308	0.00803382	1.55203	up	0.00506321	1.54495	up	0.000469132	1.74505	up
11	D-Ala-D-Ala	C6 H12 N2 O3	160.085	1.37	143.082	0.00204751	1.48816	up	0.0267679	1.32054	up	0.00175806	1.6004	up
12	3,8,9-trihydroxy-10-propyl-3,4,5,8,9,10-hexahydro-2H-oxecin-2-one	C12 H20 O5	245.137	5.094	244.13	0.00647203	1.5346	up	0.00147456	2.04717	up	0.000888144	1.73541	up
13	(5-L-Glutamyl)-L-Amino Acid	C8 H14 N2 O5	218.091	1.755	219.098	0.000915349	1.83507	up	0.000624307	2.07688	up	0.00134005	1.31602	up
14	Pipecolic acid	C6 H11 N O2	129.079	1.761	130.087	0.000244593	2.39377	up	0.000303649	2.10567	up	0.0011351	1.40553	up
15	L-Threonic acid Calcium Salt	C8 H14 Ca O10	310.02	2.753	311.027	0.00898973	1.56486	down	0.00302244	1.68275	down	0.0481445	1.02764	down
16	1,4-dihydroxyheptadec-16-en-2-yl acetate	C19 H36 O4	310.25	8.067	311.257	0.000176812	2.27586	down	0.000710604	1.9178	down	0.000226049	1.57265	down
17	trans-Petroselinic acid	C18 H34 O2	328.261	8.987	327.254	0.0236969	1.48484	down	0.0184197	1.53616	down	0.012903	1.31358	down
18	Adenylyl Sulfate	C10 H14 N5 O10 P S	427.02	2.27	428.027	0.00860311	2.03978	down	0.0112866	1.93108	down	0.0135638	1.38651	down
19	3-(4-methoxyphenyl)-1-methyl-1H-1,2,4-triazol-5-ol	C10 H11 N3 O2	454.137	2.801	228.076	0.00367044	1.55103	down	0.0174721	1.51986	down	0.00965657	1.2136	down
20	4-Pregnen-17alpha,20alpha-Diol-3-One	C21 H32 O3	332.235	8.028	331.228	0.00431684	1.20375	down	0.00347966	1.73975	down	0.000508055	1.69267	down
21	10-Hydroxydecanoic acid	C10 H20 O3	188.141	6.569	187.134	0.0107021	1.64299	down	0.0032166	2.14224	down	0.00497267	1.54437	down
22	Delta-Tridecalactone	C13 H24 O2	212.177	7.11	211.17	0.000371556	2.02875	down	0.000141493	2.33999	down	0.000364838	1.39489	down
